# Supplementary material for: App-based multidisciplinary back pain treatment versus combined physiotherapy plus online education: a randomized controlled trial
Source: PubMed Central journal article supplement (PMC6550294; doi:10.1038/s41746-019-0109-x), 2019-05-03
Supplement: 41746_2019_109_MOESM1_ESM.pdf [file 41746_2019_109_MOESM1_ESM.pdf]

## **Supplementary Methods**

### **Inclusion criteria:**

- Patients with lumbar back pain
- Age: 18-65y
- Pain duration: 6 weeks– 12 months
- Having a smartphone
- Average pain  $\geq$  4 NRS in the preceding 2 weeks

### **Exclusion criteria:**

- Insufficient knowledge of German language
- Limited contractual capability
- Any malignant disorder in past medical history
- Radiculopathy with sensorimotor deficit
- Any spinal surgery in past medical history
- Any rheumatological disorder in past medical history
- Osteoporosis
- Infectious disorders of the spinal column
- Dementia
- Severe internal medicine disorders
- Severe neurological disorders
- Any known bone disorders
- Illicit drug use or alcohol abuse
- Pregnancy
- Prior subscription to Kaia App

### **Weekly educational links sent to patients in control group**

Week 1:

<https://www.tk.de/tk/sport/gesunder-ruecken/rueckenbeschwerden/20616>

Week 2:

<http://www.patienten-information.de/patientenleitlinien>

<http://www.patienten-information.de/kurzinformationen/ruecken/akuter-kreuzschmerz>

<http://www.patienten-information.de/kurzinformationen/ruecken/chronischerkreuzschmerz>

Week 3:

<https://nordost.aok.de/inhalt/rueckenschmerzen-2/>

(meanwhile not available anymore)

Week 4:

<http://www.br.de/gesundheitstag/rueckenschmerzen/rueckenproblemerueckenschmerzen-ruhe-bewegung-operation-100.html>

Week 5:

<https://www.dgss.org/patienteninformationen/schmerzerkrankungen/rueckenschmerz/>

Week 6:

<https://www.agr-ev.de/de/>
